# Supplementary material for: Optimal cultivation measures for maize production in the drylands of the Loess Plateau
Source: PeerJ journal article supplement (doi:10.7717/peerj.19654), 2025-07-16
Supplement: supplementary_materials.zip [file Raw data.xlsx]

## Sheet: Sheet1
	2022 yield （kg）			2022 yield （kg）			2022 yield （kg）
Treatments	1	2	3	1	2	3	1	2	3
M1N1D1	6.4164	6.5436	6.09609	6.69634	7.08291	6.66129	6.07217	6.3192	6.3684
M3N1D1	6.58466	6.62263	6.75086	7.086	6.92837	6.58877	6.405	6.46406	6.039
M1N3D1	6.8622	7.03731	7.11514	6.81506	7.3218	6.8592	6.2862	6.49894	6.564
M3N3D1	7.0842	7.10263	7.15037	7.60234	7.38977	7.02514	6.99103	7.1676	7.04323
M1N1D3	5.10698	5.22627	5.13409	5.38347	5.45585	5.15602	4.75385	4.83791	4.992
M3N1D3	5.91611	5.73987	5.49142	5.59909	5.86533	5.49851	4.85105	4.98676	4.89655
M1N3D3	5.88196	5.96842	5.86658	5.80478	5.7342	5.71353	5.26958	5.44675	5.39051
M3N3D3	6.34096	5.96144	6.17809	6.03382	5.97638	5.57002	5.75116	5.46742	5.52147
M4N2D2	6.38633	6.58227	6.63067	6.3654	6.4556	6.31513	6.24333	6.2838	6.00427
M5N2D2	7.16247	7.58807	7.38567	6.79567	7.1614	6.8832	6.45827	6.5756	6.69773
M2N4D2	6.0098	6.17407	6.44213	6.10727	5.98167	6.28833	5.69473	5.664	5.86547
M2N5D2	6.81	6.50187	6.667	6.30533	6.2506	6.52887	6.10453	6.24293	6.16287
M2N2D4	7.39088	7.42239	7.17009	7.12175	7.25238	6.7204	6.99656	6.9132	7.223
M2N2D5	4.69547	4.83892	4.56304	4.95616	4.83504	4.76001	4.5956	4.65223	4.70503
M2N2D2	6.94867	6.8284	6.52767	6.649	6.83113	6.751	6.582	6.6456	6.67633
M2N2D2	6.8214	6.73467	6.53473	6.98253	6.809	6.69267	6.38453	6.65067	6.59733
M2N2D2	6.531	6.65493	6.91867	6.7498	6.60093	6.93553	6.5176	6.45673	6.5936
M2N2D2	6.76867	6.66447	6.40267	6.4954	6.6064	6.8912	6.4358	6.5756	6.65007
M2N2D2	6.6028	6.82873	6.949	6.65533	6.90313	6.99373	6.4576	6.738	6.65333
M2N2D2	6.7488	6.60807	6.50013	6.5036	6.66627	6.61767	6.5776	6.68447	6.74427
M2N2D2	6.61767	6.5014	6.75867	6.52627	6.58167	6.8356	6.45293	6.65027	6.764
M2N2D2	6.69873	6.64893	7.03933	6.90533	6.72407	6.73333	6.52433	6.59747	6.64553
M2N2D2	6.6022	6.8312	7.03307	6.64907	6.94867	6.88447	6.624	6.6974	6.46587
